# Supplementary material for: Direct one-pot synthesis of poly(ionic liquid) nanogels by cobalt-mediated radical cross-linking copolymerization in organic or aqueous media
Source: Royal Society of Chemistry journal article supplement (doi:10.1039/c6py00112b), 2016-01-01
Supplement: c6py00112b1.pdf [file c6py00112b1.pdf]

## Supporting information

### Direct One-pot Synthesis of Poly(ionic liquid) Nanogels by Cobalt-Mediated Radical Cross-linking Copolymerization in organic or aqueous media

Mathilde Weiss-Maurin,<sup>†‡</sup> Daniela Cordella,<sup>†</sup> Christine Jérôme,<sup>†</sup> Daniel Taton<sup>‡\*</sup> and Christophe Detrembleur <sup>†\*</sup>

<sup>†</sup>Centre of Education and Research on Macromolecules (CERM), university of Liège, Sart-Tilman B6, 4000 Liège, Belgium

<sup>‡</sup>Laboratoire de Chimie des Polymères Organiques (LCPO), University of Bordeaux, 16 avenue Pey Berland, 33607 Pessac Cedex, France

#### Supported Tables

**Table S1.** Kinetics data for the copolymerization of VAc with DVA bulk at 40 °C, with [VAc]/[**1**] = 60.

| Entry | DVA<br>(% mol)                                                                                  | Time (h) | conv (%) <sup>a</sup> | M <sub>n</sub><br>(g/mol) <sup>b</sup> | M <sub>p</sub><br>(g/mol) <sup>b</sup> | M <sub>w</sub> /M <sub>n</sub> <sup>c</sup> |
|-------|-------------------------------------------------------------------------------------------------|----------|-----------------------|----------------------------------------|----------------------------------------|---------------------------------------------|
| 1     | <b>0</b><br>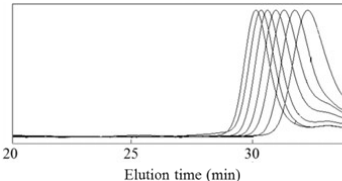 | 2        | 12                    | 1300                                   | 1600                                   | 1.17                                        |
|       |                                                                                                 | 4        | 27                    | 2500                                   | 2700                                   | 1.08                                        |
|       |                                                                                                 | 5        | 29                    | 3100                                   | 3300                                   | 1.07                                        |
|       |                                                                                                 | 7        | 34                    | 4100                                   | 4500                                   | 1.07                                        |
|       |                                                                                                 | 2        | 16                    | 1700                                   | 2100                                   | 1.28                                        |
| 2     | <b>2</b><br> | 4        | 23                    | 2500                                   | 3200                                   | 1.59                                        |
|       |                                                                                                 | 5        | 20                    | 4400                                   | 4000                                   | 1.38                                        |
|       |                                                                                                 | 7        | 29                    | 5700                                   | 4700                                   | 1.50                                        |
|       |                                                                                                 | 2        | 10                    | 1500                                   | 2000                                   | 1.31                                        |
| 3     | <b>4</b><br> | 4        | 22                    | 2300                                   | 3400                                   | 1.66                                        |
|       |                                                                                                 | 5        | 26                    | 2900                                   | 3900                                   | 1.88                                        |
|       |                                                                                                 | 7        | 37                    | 4500                                   | 5400                                   | 2.94                                        |
|       |                                                                                                 | 2        | 6                     | 2000                                   | 2400                                   | 1.53                                        |
| 4     | <b>6</b><br> | 4        | 19                    | 3200                                   | 3900                                   | 1.69                                        |
|       |                                                                                                 | 5        | 22                    | 4500                                   | 4600                                   | 2.05                                        |
|       |                                                                                                 | 7        | 26                    | 11100                                  | 5800                                   | 3.35                                        |

<sup>a</sup> Determined by <sup>1</sup>H NMR in CDCl<sub>3</sub>. <sup>b</sup> Determined by SEC in THF using PS calibration.

**Table S2.** Kinetics of the polymerization of vinyl acetate and its copolymerizations with divinyl adipate in ethyl acetate at 40 °C.

| Entry    | DVA (mol%) | time (h) | conv (%) <sup>a</sup> | M <sub>n</sub> <sup>b</sup><br>(g/mol) | M <sub>p</sub> <sup>b</sup><br>(g/mol) | M <sub>w</sub> /M <sub>n</sub> <sup>b</sup> |
|----------|------------|----------|-----------------------|----------------------------------------|----------------------------------------|---------------------------------------------|
| <b>1</b> | 2          | 8        | 21                    | - <sup>c</sup>                         | - <sup>c</sup>                         | - <sup>c</sup>                              |
|          |            | 24       | 40                    | 2200                                   | 3400                                   | 1.4                                         |
|          |            | 48       | 60                    | - <sup>c</sup>                         | - <sup>c</sup>                         | - <sup>c</sup>                              |
|          |            | 120      | 100                   | 5500                                   | 10700                                  | 2.4                                         |
| <b>2</b> | 4          | 8        | 24                    | 1300                                   | 1600                                   | 1.17                                        |
|          |            | 24       | 43                    | 2100                                   | 2600                                   | 1.4                                         |
|          |            | 48       | 58                    | 3800                                   | 5400                                   | 1.9                                         |
|          |            | 120      | 100                   | 4300                                   | 11900                                  | 2.6                                         |
| <b>3</b> | 6          | 8        | 18                    | - <sup>c</sup>                         | - <sup>c</sup>                         | - <sup>c</sup>                              |
|          |            | 24       | 38                    | 2200                                   | 2900                                   | 1.5                                         |
|          |            | 48       | 59                    | 4700                                   | 6100                                   | 2.3                                         |
|          |            | 120      | 100                   | 16600                                  | 39400                                  | 2.8                                         |

<sup>a</sup> Determined by <sup>1</sup>H NMR in CDCl<sub>3</sub>. <sup>b</sup> Determined by SEC in THF using PS calibration. <sup>c</sup> Not determined. Conditions: [VAc]/[**1**] = 60, [VAc] = 0.493M, x mol% DVA, 40 °C, ethyl acetate.

**Table S3.** Complete follow-up on kinetics data of the poly(VEtImBr-DVI) nanogels, via <sup>1</sup>H NMR and SEC in THF.

| Entry                | Solvent          | %mol DVI | Time (h) | Global conv (%) <sup>a</sup> | M <sub>n</sub> <sup>b</sup> (g/mol) | M <sub>p</sub> <sup>b</sup> (g/mol) | M <sub>w</sub> /M <sub>n</sub> |
|----------------------|------------------|----------|----------|------------------------------|-------------------------------------|-------------------------------------|--------------------------------|
| <b>1</b>             | DMF              | 0        | 0.25     | 70                           | 11800                               | 16000                               | 1.26                           |
|                      |                  |          | 1        | 85                           | 13600                               | 18100                               | 1.24                           |
|                      |                  |          | 4        | 98                           | 14800                               | 20000                               | 1.25                           |
| <b>2<sup>b</sup></b> | DMF              | 2.9      | 0.25     | 50                           | - <sup>c</sup>                      | - <sup>c</sup>                      | - <sup>c</sup>                 |
|                      |                  |          | 1        | 83                           | - <sup>c</sup>                      | - <sup>c</sup>                      | - <sup>c</sup>                 |
|                      |                  |          | 4        | 96                           | - <sup>c</sup>                      | - <sup>c</sup>                      | - <sup>c</sup>                 |
|                      |                  |          | 8        | 98                           | - <sup>c</sup>                      | - <sup>c</sup>                      | - <sup>c</sup>                 |
| <b>3<sup>b</sup></b> | DMF              | 4.8      | 0.25     | 42                           | 11700                               | 14600                               | 1.23                           |
|                      |                  |          | 1        | 59                           | 13000                               | 14400                               | 1.23                           |
|                      |                  |          | 4        | 77                           | 12000                               | 15200                               | 1.24                           |
|                      |                  |          | 30       | 95                           | 13500                               | 19900                               | 1.32                           |
| <b>4</b>             | DMF/MeOH         | 0        | 1        | 33                           | 8400                                | 9000                                | 1.15                           |
|                      |                  |          | 2        | 53                           | 9800                                | 13000                               | 1.22                           |
|                      |                  |          | 4        | 64                           | 12100                               | 16500                               | 1.22                           |
|                      |                  |          | 8        | 75                           | 11900                               | 17800                               | 1.27                           |
| <b>5</b>             | DMF/MeOH         | 2.9      | 0.25     | 14                           | 5500                                | 6100                                | 1.15                           |
|                      |                  |          | 1        | 33                           | 7900                                | 8600                                | 1.21                           |
|                      |                  |          | 4        | 63                           | 11900                               | 14300                               | 1.29                           |
|                      |                  |          | 8        | 75                           | 14600                               | 18300                               | 1.33                           |
| <b>6</b>             | DMF/MeOH         | 4.8      | 0.25     | 17                           | 9000                                | 9600                                | 1.17                           |
|                      |                  |          | 1        | 37                           | 13700                               | 13800                               | 1.24                           |
|                      |                  |          | 4        | 56                           | 21400                               | 21800                               | 1.45                           |
|                      |                  |          | 24       | 81                           | 24900                               | 37100                               | 1.63                           |
| <b>7</b>             | H <sub>2</sub> O | 0        | 0.25     | 25                           | 10100                               | 12600                               | 1.28                           |
|                      |                  |          | 1        | 40                           | 13600                               | 17300                               | 1.22                           |
|                      |                  |          | 4        | 68                           | 18700                               | 25000                               | 1.23                           |
|                      |                  |          | 8        | 73                           | 20400                               | 29700                               | 1.30                           |
|                      |                  |          | 24       | 87                           | 21300                               | 34800                               | 1.36                           |
|                      |                  |          | 30       | 87                           | 21200                               | 35600                               | 1.36                           |
| <b>8</b>             | H <sub>2</sub> O | 2.9      | 0.25     | 19                           | 12100                               | 14700                               | 1.27                           |
|                      |                  |          | 1        | 40                           | 12900                               | 16300                               | 1.26                           |
|                      |                  |          | 4        | 61                           | 14900                               | 19000                               | 1.29                           |
|                      |                  |          | 8        | 72                           | 22500                               | 32900                               | 1.41                           |
|                      |                  |          | 24       | 80                           | 23700                               | 39700                               | 1.48                           |
| <b>9</b>             | H <sub>2</sub> O | 4.8      | 0.25     | 21                           | 12500                               | 15300                               | 1.28                           |
|                      |                  |          | 1        | 36                           | 14200                               | 15600                               | 1.27                           |
|                      |                  |          | 4        | 64                           | 22300                               | 28900                               | 1.30                           |
|                      |                  |          | 8        | 78                           | 26600                               | 70700                               | 1.42                           |
|                      |                  |          | 24       | gel                          |                                     |                                     |                                |

<sup>a</sup> Determined by <sup>1</sup>H NMR in DMSO-d<sub>6</sub>. <sup>b</sup> Determined by SEC in THF with LiTf<sub>2</sub>N. <sup>c</sup> Not determined. Conditions: [VetImBr]/[**1**] = 60, [VetImBr] = 0.493M, x mol% DVI, 30 °C.

**Table S4.** Complete follow-up on kinetics data of the poly(VetImBr-DVI) nanogels, via <sup>1</sup>H NMR and aqueous SEC.

| Entry | %mol DVI | Polymerization solvent | Polymerization time (h) | Global conversion(%) <sup>a</sup> | M <sub>n</sub> , aq (g/mol) <sup>b</sup> | M <sub>p</sub> , aq (g/mol) <sup>b</sup> | M <sub>w</sub> /M <sub>n</sub> , aq |
|-------|----------|------------------------|-------------------------|-----------------------------------|------------------------------------------|------------------------------------------|-------------------------------------|
| 1     | 0        | DMF                    | 0.25                    | 47                                | 4200                                     | 5000                                     | 1.28                                |
|       |          |                        | 1                       | 66                                | 6800                                     | 7700                                     | 1.37                                |
|       |          |                        | 4                       | 87                                | 9000                                     | 10600                                    | 1.43                                |
| 2     | 2.9      | DMF                    | 0.25                    | 44                                | 5100                                     | 4900                                     | 2.11                                |
|       |          |                        | 1                       | 71                                | 6800                                     | 5900                                     | 2.18                                |
|       |          |                        | 4                       | 87                                | 9600                                     | 9500                                     | 2.16                                |
|       |          |                        | 6                       | 90                                | 9800                                     | 10200                                    | 2.18                                |
| 3     | 4.8      | DMF                    | 0.25                    | 42                                | - <sup>c</sup>                           | - <sup>c</sup>                           | - <sup>c</sup>                      |
|       |          |                        | 1                       | 59                                | - <sup>c</sup>                           | - <sup>c</sup>                           | - <sup>c</sup>                      |
|       |          |                        | 4                       | 77                                | - <sup>c</sup>                           | - <sup>c</sup>                           | - <sup>c</sup>                      |
|       |          |                        | 30                      | 95                                | - <sup>c</sup>                           | - <sup>c</sup>                           | - <sup>c</sup>                      |
| 6     | 4.8      | DMF/MEOH               | 0.25                    | 17                                | 2800                                     | 3700                                     | 1.74                                |
|       |          |                        | 1                       | 37                                | 5800                                     | 7000                                     | 1.69                                |
|       |          |                        | 4                       | 56                                | 11200                                    | 13700                                    | 2.45                                |
|       |          |                        | 24                      | 81                                | 19200                                    | 26900                                    | 4.10                                |
| 7     | 0        | H <sub>2</sub> O       | 0.25                    | 25                                | 4300                                     | 6100                                     | 2.10                                |
|       |          |                        | 1                       | 40                                | 6800                                     | 9600                                     | 1.64                                |
|       |          |                        | 4                       | 68                                | 10700                                    | 16500                                    | 1.64                                |
|       |          |                        | 24                      | 87                                | 14800                                    | 28600                                    | 1.91                                |
| 8     | 2.9      | H <sub>2</sub> O       | 0.25                    | 19                                | 5000                                     | 7200                                     | 2.08                                |
|       |          |                        | 1                       | 40                                | 8700                                     | 11400                                    | 2.00                                |
|       |          |                        | 4                       | 61                                | 15100                                    | 20800                                    | 2.42                                |
|       |          |                        | 24                      | 80                                | 21600                                    | 41200                                    | 2.7                                 |
| 9     | 4.8      | H <sub>2</sub> O       | 0.25                    | 21                                | 5100                                     | 7400                                     | 2.14                                |
|       |          |                        | 1                       | 36                                | 8700                                     | 10200                                    | 2.55                                |
|       |          |                        | 4                       | 64                                | 17800                                    | 18500                                    | 3.45                                |
|       |          |                        | 8                       | 78                                | - <sup>c</sup>                           | - <sup>c</sup>                           | - <sup>c</sup>                      |
|       |          |                        | 24                      | gel                               | - <sup>c</sup>                           | - <sup>c</sup>                           | - <sup>c</sup>                      |

<sup>a</sup> Determined by <sup>1</sup>H NMR in DMSO-d<sub>6</sub>. <sup>b</sup> Determined by SEC in water (containing 0.1M NaCl and 0.1 vol% TFA) <sup>c</sup> not determined. Conditions: [VetImBr]/[**1**] = 60, [VetImBr] = 0.493M, x mol% DVI, 30 °C.

## Supported Figures

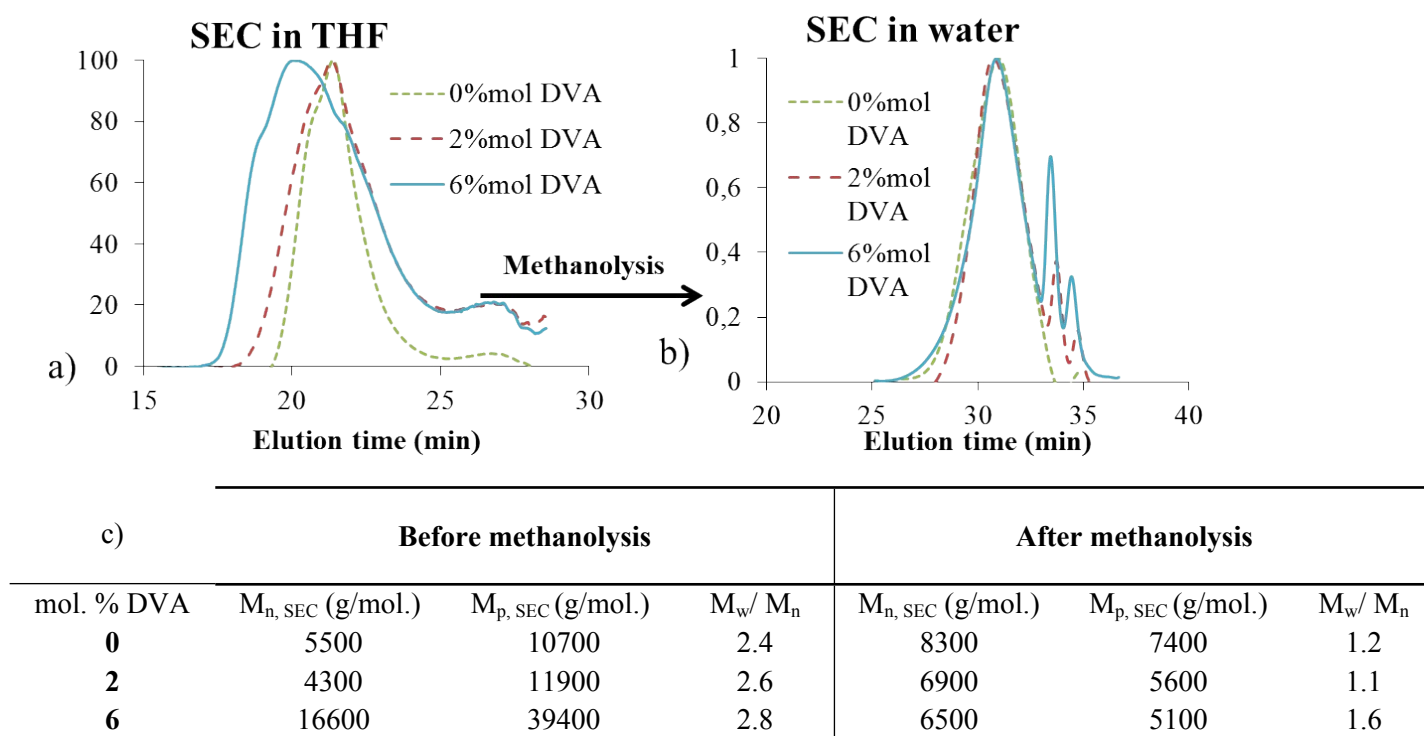

**Figure S1.** a) SEC traces (in THF) of PVAc and poly(VAc-DVA) nanogels prepared with different contents of DVA before methanolysis (entries 1,2 and 4, Table 1); b) SEC traces (in water) for PVA after methanolysis of the parent PVAc and poly(VAc-DVA) nanogels; c) corresponding molecular characteristics of the different copolymer samples.

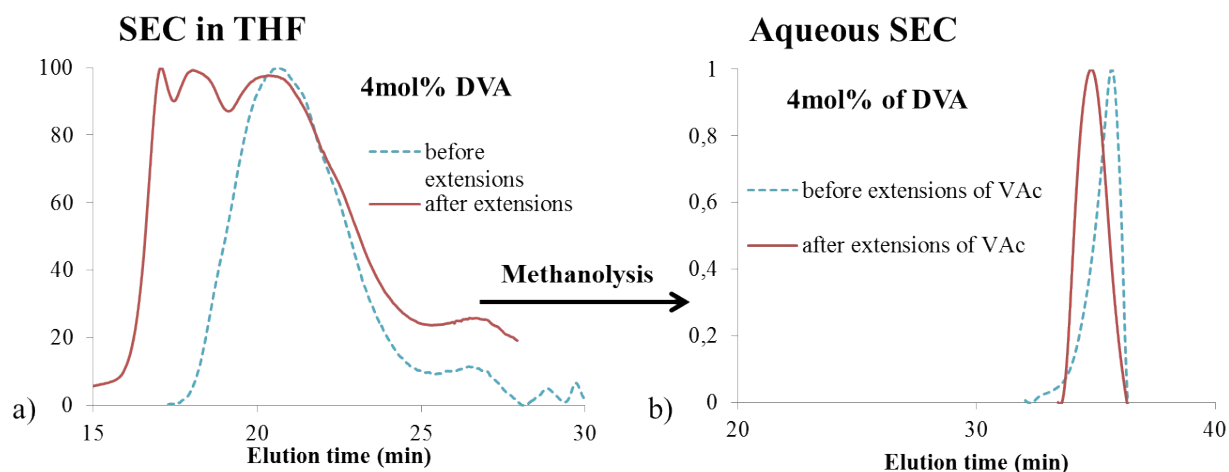

|                                  | Conv.<br>(%) | $M_n$<br>(g/mol) | $M_p$<br>(g/mol) | $M_w/M_n$ |
|----------------------------------|--------------|------------------|------------------|-----------|
| 1 <sup>st</sup><br>generation    | 70           | 10000            | 16000            | 2.1       |
| c) 2 <sup>nd</sup><br>generation | 30           | 19100            | 545900           | 8.6       |

**Figure S2.** a) SEC traces (in THF) of a chain extension polymerization on a poly(VAc-4mol% DVA) nanogel before methanolysis; b) SEC traces (in water) of primary chains of linear PVA (of the 1<sup>st</sup> and 2<sup>nd</sup> generation nanogels) after methanolysis in water; c) molecular characteristics for the 1<sup>st</sup> and 2<sup>nd</sup> generation of nanogels. Conditions: [VAc]/[**1**] = 60, [VAc] = 0.493M, 40 °C, [VAc]/[DVA] = 4, in ethyl acetate.

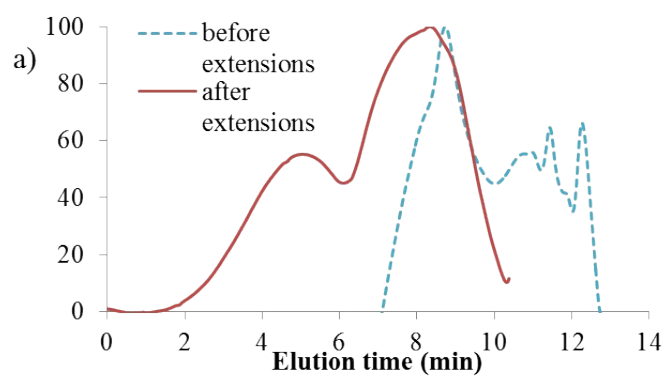

| b)                       | Conv (%) <sup>a</sup> | $M_{n, SEC}$ (g/mol) <sup>b</sup> | $M_{p, SEC}$ (g/mol) <sup>b</sup> | $M_w/M_n$ <sup>b</sup> |
|--------------------------|-----------------------|-----------------------------------|-----------------------------------|------------------------|
| <b>Before extensions</b> | 100                   | 6100                              | 3100                              | 2.0                    |
| <b>After extensions</b>  | 13                    | 39600                             | 29900                             | 2.6                    |

**Figure S3.** a) SEC traces (in THF containing 10 mM LiTf<sub>2</sub>N) of the 1<sup>st</sup>-generation poly(VAc-DVA) nanogel corresponding to Table 1, entry 3 (blue, dotted line) and the same nanogel after chain extensions with *N*-vinyl-3-ethyl imidazolium NTf<sub>2</sub> (red, plain line); b) macromolecular characteristics of the nanogel before and after chain extension.

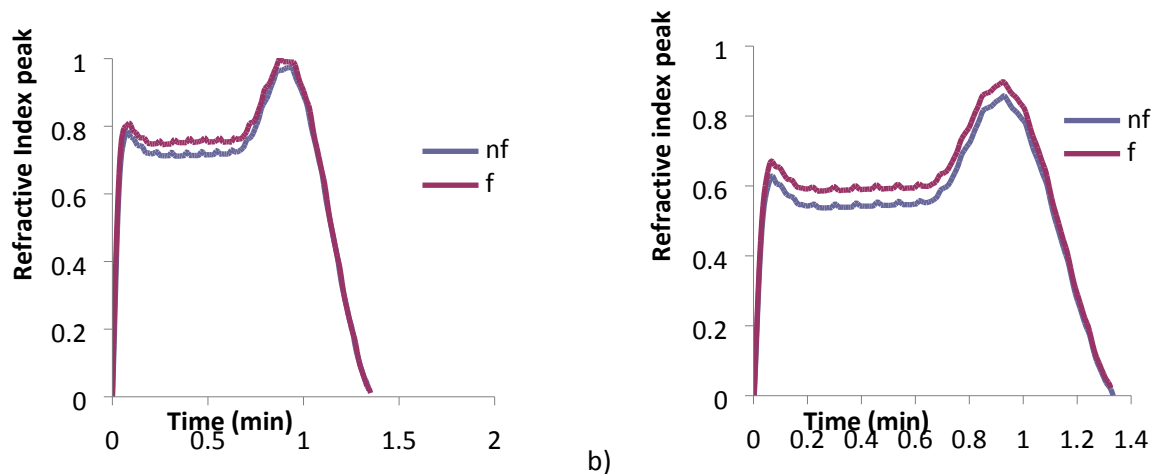

**Figure S4.** Intensity signal of the refractive index detector for: a) the nanogel synthesized in DMF/MeOH mixture (Table 2, entry 6) or b) the nanogel synthesized in water (Table 2, entry 9), before (nf) and after (f) filtration of the sample on a 0.2 $\mu$ m filter. Prior to analysis, the nanogels are solubilized in THF containing 10 mM LiTFSI at a concentration of 1 mg/mL. The very slight difference in peak area can be ascribed to the shearing of the solvent during filtration.



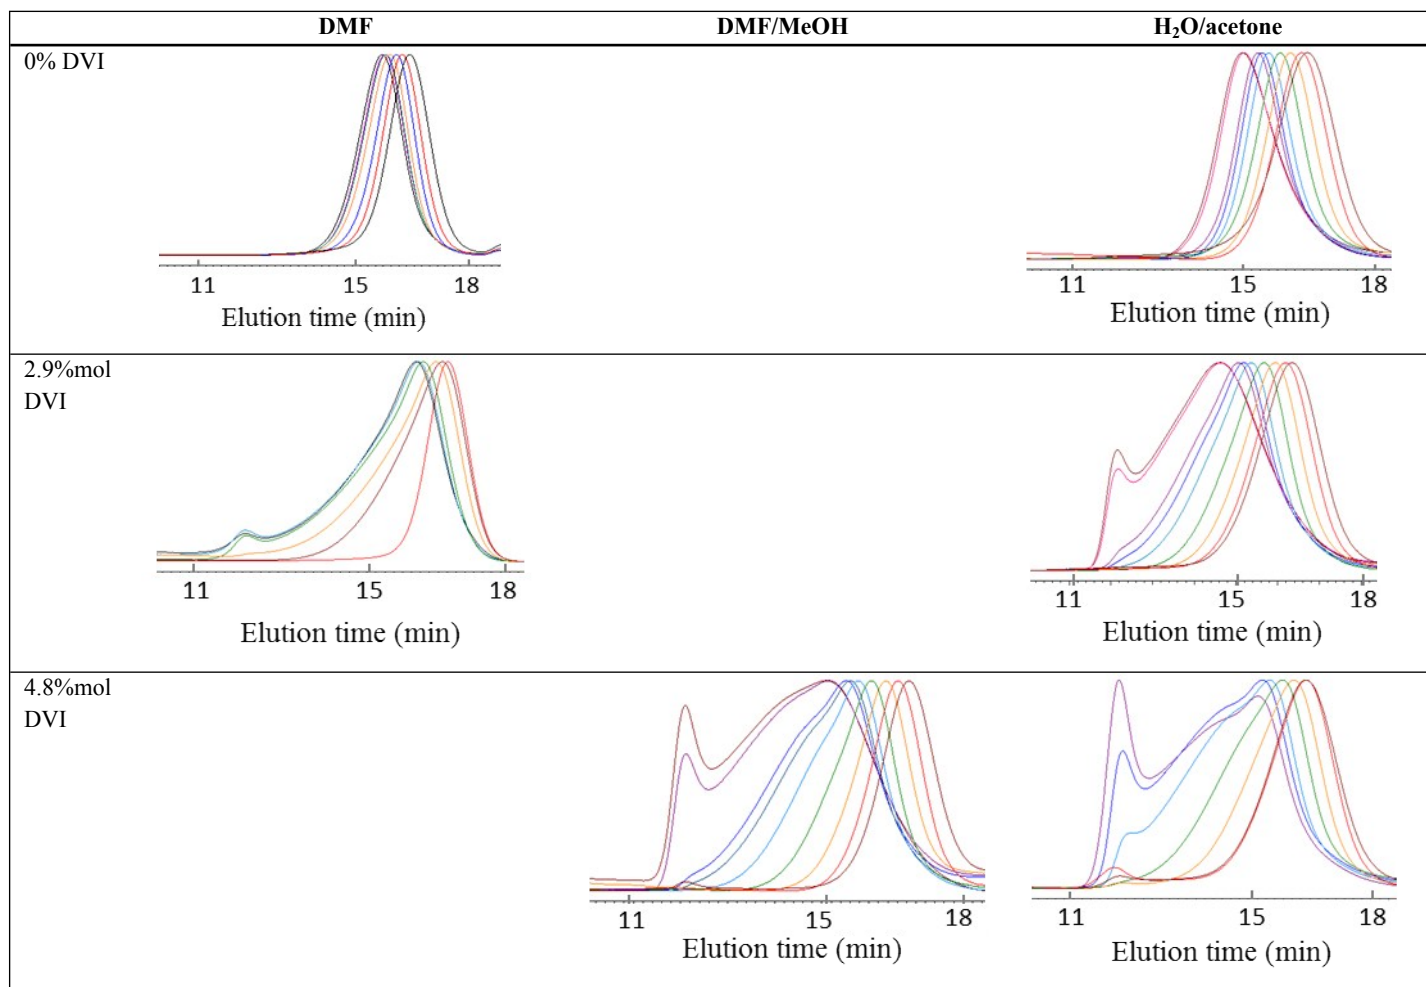

**Figure S5.** Aqueous SEC chromatograms for the kinetics of copolymerization of VEtImBr with DVI.
